# Supplementary material
Source: PubMed Central journal article supplement (PMC2896310)
Supplement: NIHMS160886-supplement-01.pdf [file NIHMS160886-supplement-01.pdf]

# The incoherent feedforward loop can provide fold-detection in gene regulation

Lea Goentoro, Oren Shoval, Marc W. Kirschner and Uri Alon

**Supplement**

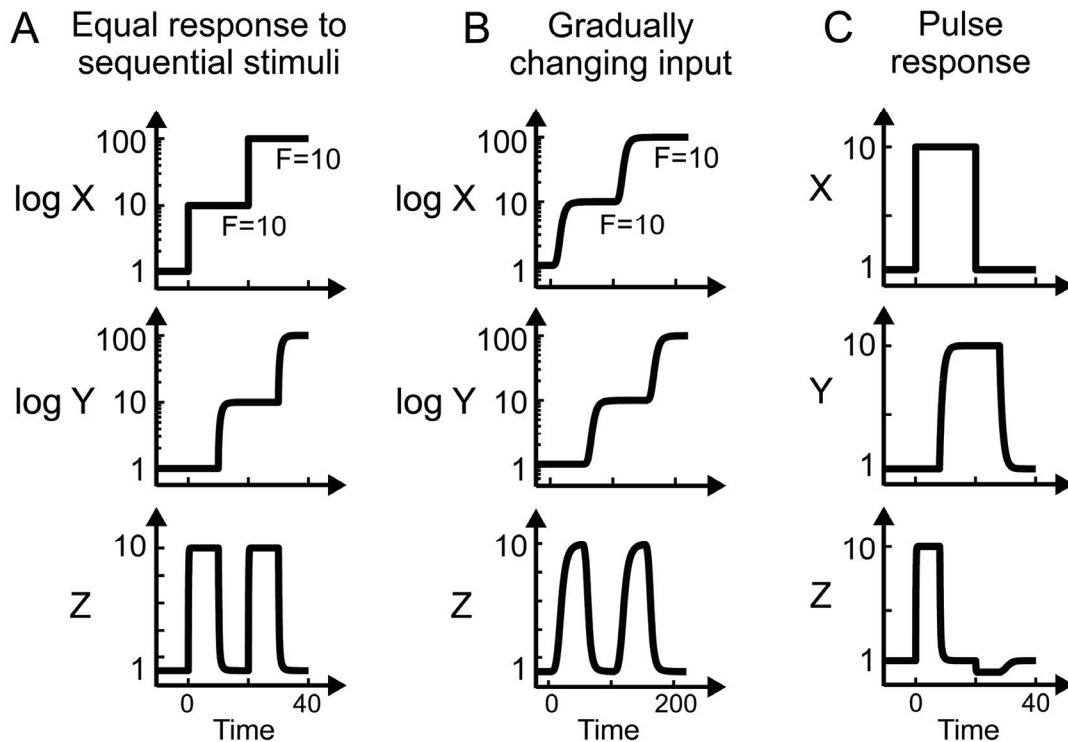

**Figure S1. I1-FFL shows fold-change detection to sequential steps, gradually changing input, and pulses.**

**(A)** The I1-FFL maintains identical response to sequential signal steps with the same fold-change. **(B)** The fold-change detection feature is maintained for any time varying form of input  $X(t)$ . **(C)** The I1-FFL responds to a pulse showing undershoot of  $Z$  dynamics. Pulse signals are normally found in biological systems. A pulse-like signal also mimics a situation when after a period of signaling, signal degrades away or is actively removed to prepare cells for the next round of signaling. Removal of signal resets the memory  $Y$  ( $Y$  returns to the basal level) without affecting the transcription of  $Z$  significantly (if the basal transcription of  $Z$  is negligible).

**Figure S2. Other common transcriptional network motifs show response that depends on the absolute levels of the input**

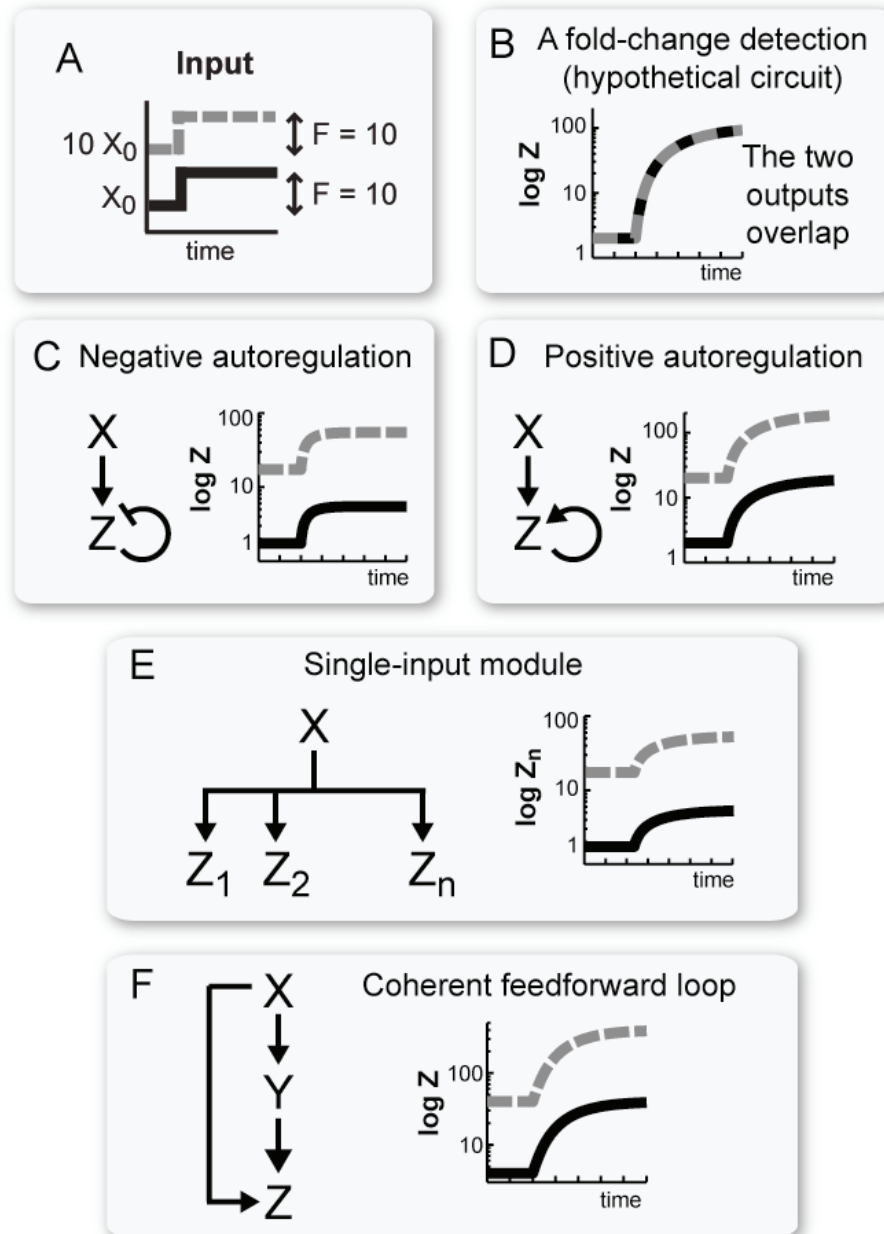

For illustration purposes, we stimulated network motifs with two step inputs of different absolute levels, but identical fold-changes (**A**). If a circuit shows a response that depends on the fold-changes in the input, and not the absolute levels of the input, then the outputs to the two step stimuli would perfectly overlap (**B**). All

motifs, except for the incoherent FFLs, do not show fold-change detection: the dynamics and level of Z depends on the absolute level of the activator X.

Intuitively, fold-change detection first requires a memory of the basal level of the activator X. Recurrent network motifs such as positive autoregulation, negative autoregulation, and single-input module do not have a built-in memory of X.

Consequently, they cannot provide fold-change detection (**C-E**).

Another motif, the coherent feedforward loop (**F**), resembles the incoherent feedforward loop, with one difference: the effect of Y on the output Z is coherent to the effect of X on Z (*i.e.*, Y activates Z instead of repressing it). This difference abolishes the fold-change detection behavior. Even though Y mimics the level of the activator X (hence acting as a memory of X), it no longer facilitates a temporal comparison between the basal level of X and the new level of X (because Y amplifies, and not opposes, the effects of X).

Mathematically, fold-change detection translates into a structural requirement of how Y appears in the differential equation describing the dynamics of Z.

**Figure S3. I1-FFL connected in a different way can provide fold-change detection.**

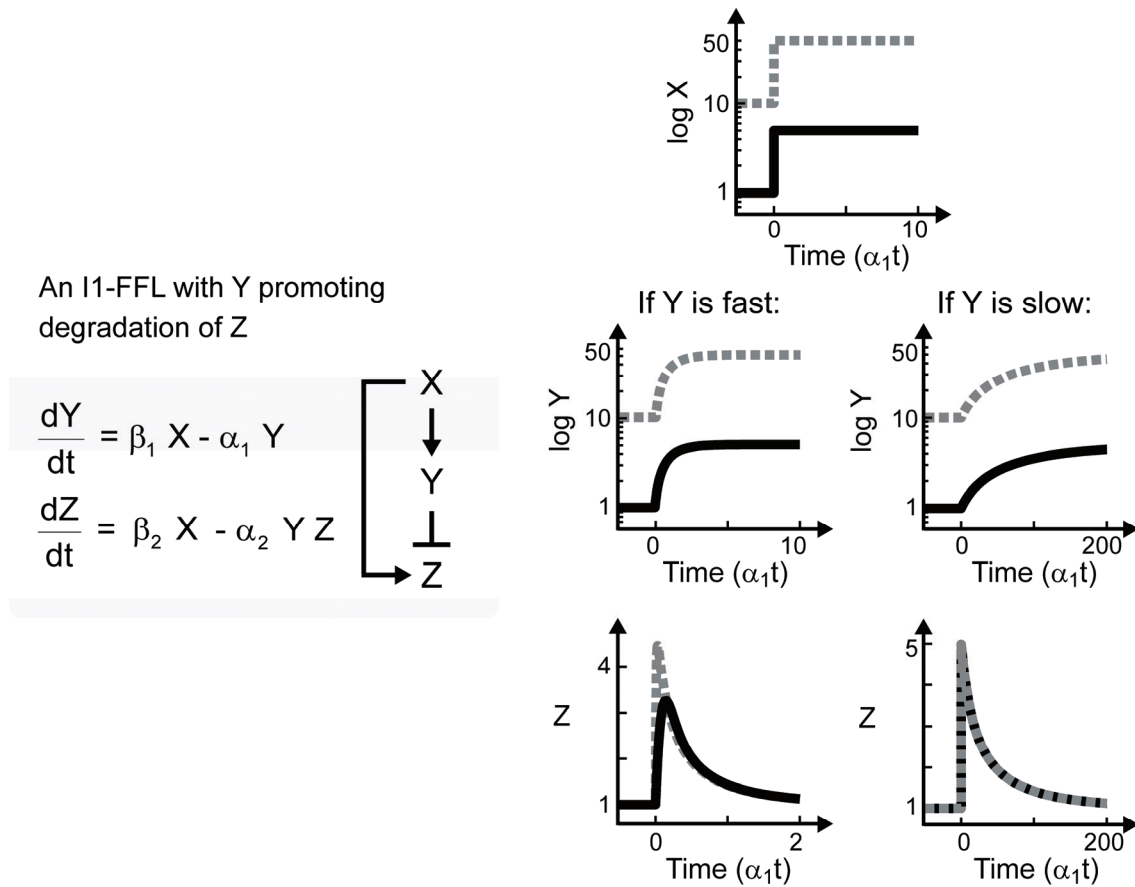

An I1-FFL where Y acts by degrading Z, rather than repressing the production of Z (Levchenko and Iglesias, 2002; Ma et al., 2009; Tyson et al., 2003) can provide fold-change detection in the limit where the dynamics of Y is very slow or delayed relative to the dynamics of Z. Under this condition, a quasi steady-state prevails: Z is at quasi steady-state, slaved by the slow dynamics of Y,  $Z_{st} = \frac{\beta_2 X}{\alpha_2 Y(t, X)}$ . Since Y also depends on X, this cancels the X-dependence of Z. In this limit, at all time, Z responds only to fold-changes in the activator X.

## Analytical solution for the I1-FFL

As derived in Box in the main text, the dynamic equations for Y and Z are:

$$\frac{dY}{dt} = \beta_1 X - \alpha_1 Y \quad (1)$$

$$\frac{dZ}{dt} = \frac{\beta_2 X}{Y} - \alpha_2 Z \quad (2)$$

Let us define the following dimensionless variables,

$$y = \frac{Y}{\beta_1 X_0 / \alpha_1} \quad (3)$$

$$z = \frac{Z}{\beta_2 \alpha_1 / \beta_1 \alpha_2} \quad (4)$$

$$\tau = \frac{t}{1/\alpha_1} \quad (5)$$

$$f = \frac{X}{X_0} \quad (6)$$

where  $X_0$  is the basal level of X, as depicted in Figure S4. Introducing the dimensionless variables into equations 1-2, we obtain the following dimensionless dynamic equations describing the I1-FFL,

$$\frac{dy}{d\tau} = f - y \quad (7)$$

$$r \frac{dz}{d\tau} = \frac{f}{y} - z \quad (8)$$

where the dimensionless group  $r$  is defined as follows,

$$r = \frac{\alpha_1}{\alpha_2} \quad (9)$$

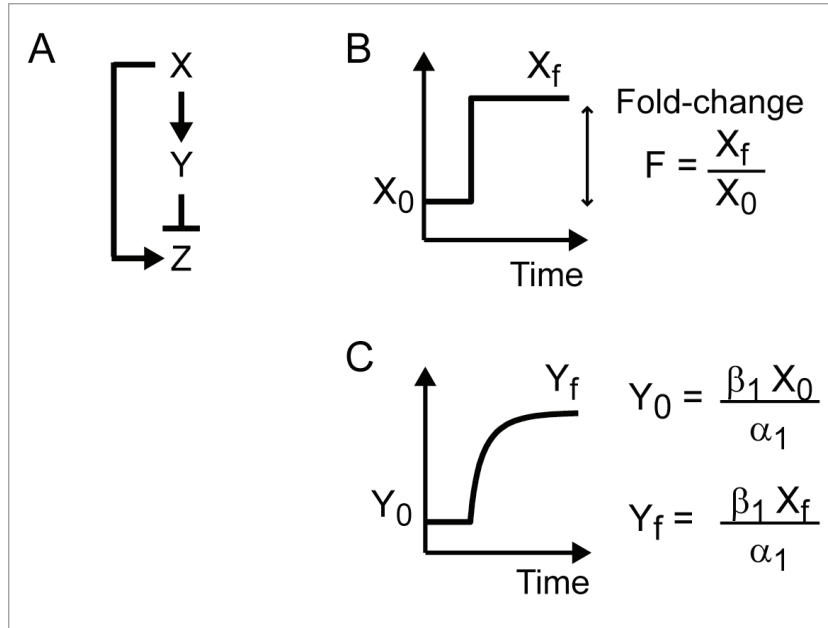

**Figure S4.** (A) The type-1 incoherent feedforward loop (I1-FFL). (B) The input to the circuit is the activator X. The **fold-change** in X is defined as the ratio of the new level of X to the previous level of X ( $F = X_f / X_0$ ). (C) Y increases to a new steady-state level in response to a step change in the level of X.

Integrating equation 7 with the initial condition  $y(0)=1$ ,

$$y = 1 + (f - 1)(1 - e^{-\tau}) \quad (10)$$

Equation 10 describes how Y changes in time in response to a step increase in the activator X (Figure S4).

Substituting equation 10 into equation 8, we obtain a closed differential equation describing the dynamics of Z,

$$r \frac{dz}{d\tau} = \frac{f}{1 + (f - 1)(1 - e^{-\tau})} - z \quad (11)$$

Equation 11 can be fully solved analytically when  $r=1$  ( $\alpha_1=\alpha_2$ ),

$$\frac{dz}{d\tau} = \frac{f}{1+(f-1)(1-e^{-\tau})} - z \quad (12)$$

Integrating equation 12 with the initial condition  $z(0)=1$ ,

$$z = \left[ e^{\tau} + \ln(fe^{\tau} - f + 1) - \frac{1}{f} \ln(fe^{\tau} - f + 1) \right] e^{-\tau} \quad (13)$$

Equation 13 shows that the dynamics of  $Z$ , both during the transient time and steady state, responds only to the fold-changes in  $X$  ( $f$ ), and not on the absolute level of  $X$ .

The profile of  $Z$  is shown in Figure S5.

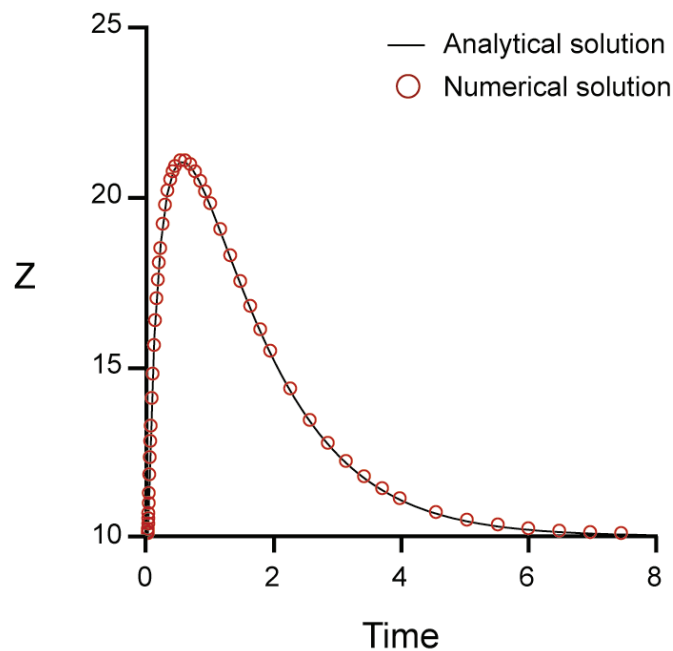

Figure S5. The dynamic of  $Z$  in response to a step increase in the activator  $X$ . The solid line depicts the analytical solution (equation 13); the circles depict the numerical solution (equation 2). The parameters used in this plot were:  $\beta_1=1$ ,  $\beta_2=10$ ,  $\alpha_1=\alpha_2=1$ ,



## References

Alon, U. (2007). *An Introduction to Systems Biology* (Boca Raton, FL: Chapman & Hall/CRC).

Barkai, N., and Leibler, S. (1997). Robustness in simple biochemical networks. *Nature* **387**, 913-917.

Basu, S., Mehreja, R., Thiberge, S., Chen, M.T., and Weiss, R. (2004).

Spatiotemporal control of gene expression with pulse-generating networks. *Proc Natl Acad Sci U S A* **101**, 6355-6360.

Bintu, L., Buchler, N.E., Garcia, H.G., Gerland, U., Hwa, T., Kondev, J., and Phillips, R. (2005). Transcriptional regulation by the numbers: models. *Curr Opin Genet Dev* **15**, 116-124.

Boyer, L.A., Lee, T.I., Cole, M.F., Johnstone, S.E., Levine, S.S., Zucker, J.P., Guenther, M.G., Kumar, R.M., Murray, H.L., Jenner, R.G., *et al.* (2005). Core transcriptional regulatory circuitry in human embryonic stem cells. *Cell* **122**, 947-956.

Cohen-Saidon, C., Cohen, A.A., Sigal, A., Liron, Y., and Alon, U. (in press). Dynamics and variability in ERK2 response to EGF in individual living cells. *Molecular Cell*.

Eichenberger, P., Fujita, M., Jensen, S.T., Conlon, E.M., Rudner, D.Z., Wang, S.T., Ferguson, C., Haga, K., Sato, T., Liu, J.S., and Losick, R. (2004). The program of gene transcription for a single differentiating cell type during sporulation in *Bacillus subtilis*. *PLoS Biol* **2**, e328.

Entus, R., Aufderheide, B., and Sauro, H.M. (2007). Design and implementation of three incoherent feed-forward motif based biological concentration sensors. *Syst Synth Biol* **1**, 119-128.

Friedland, A.E., Lu, T.K., Wang, X., Shi, D., Church, G., and Collins, J.J. (2009). Synthetic gene networks that count. *Science* **324**, 1199-1202.

Gardner, T.S., Cantor, C.R., and Collins, J.J. (2000). Construction of a genetic toggle switch in *Escherichia coli*. *Nature* **403**, 339-342.

Kaplan, S., Bren, A., Dekel, E., and Alon, U. (2008). The incoherent feed-forward loop can generate non-monotonic input functions for genes. *Mol Syst Biol* **4**, 203.

Kim, D., Kwon, Y.K., and Cho, K.H. (2008). The biphasic behavior of incoherent feed-forward loops in biomolecular regulatory networks. *Bioessays* **30**, 1204-1211.

- Krejci, A., Bernard, F., Housden, B.E., Collins, S., and Bray, S.J. (2009). Direct response to Notch activation: signaling crosstalk and incoherent logic. *Sci Signal* 2, ra1.
- Lahav, G., Rosenfeld, N., Sigal, A., Geva-Zatorsky, N., Levine, A.J., Elowitz, M.B., and Alon, U. (2004). Dynamics of the p53-Mdm2 feedback loop in individual cells. *Nat Genet* 36, 147-150.
- Laming, D. (1986). *Sensory Analysis* (London: Academic Press).
- Lee, T.I., Rinaldi, N.J., Robert, F., Odom, D.T., Bar-Joseph, Z., Gerber, G.K., Hannett, N.M., Harbison, C.T., Thompson, C.M., Simon, I., *et al.* (2002). Transcriptional regulatory networks in *Saccharomyces cerevisiae*. *Science* 298, 799-804.
- Levchenko, A., and Iglesias, P.A. (2002). Models of eukaryotic gradient sensing: application to chemotaxis of amoebae and neutrophils. *Biophys J* 82, 50-63.
- Li, X., Cassidy, J.J., Reinke, C.A., Fischboeck, S., and Carthew, R.W. (2009). A microRNA imparts robustness against environmental fluctuation during development. *Cell* 137, 273-282.
- Ma, W., Trusina, A., El-Samad, H., Lim, W.A., and Tang, C. (2009). Defining network topologies that can achieve biochemical adaptation. *Cell* 138, 760-773.
- Mangan, S., and Alon, U. (2003). Structure and function of the feed-forward loop network motif. *Proc Natl Acad Sci U S A* 100, 11980-11985.
- Mangan, S., Itzkovitz, S., Zaslaver, A., and Alon, U. (2006). The incoherent feed-forward loop accelerates the response-time of the gal system of *Escherichia coli*. *J Mol Biol* 356, 1073-1081.
- Milo, R., Shen-Orr, S., Itzkovitz, S., Kashtan, N., Chklovskii, D., and Alon, U. (2002). Network motifs: simple building blocks of complex networks. *Science* 298, 824-827.
- O'Donnell, K.A., Wentzel, E.A., Zeller, K.I., Dang, C.V., and Mendell, J.T. (2005). c-Myc-regulated microRNAs modulate E2F1 expression. *Nature* 435, 839-843.
- Ross, H.E., and Murray, D.J. (1996). *E.H. Weber on the Tactile Senses*. (East Sussex, UK, Erlbaum Taylor & Francis).
- Sigal, A., Milo, R., Cohen, A., Geva-Zatorsky, N., Klein, Y., Alaluf, I., Swerdlin, N., Perzov, N., Danon, T., Liron, Y., *et al.* (2006). Dynamic proteomics in individual human cells uncovers widespread cell-cycle dependence of nuclear proteins. *Nat Methods* 3, 525-531.

Swiers, G., Patient, R., and Loose, M. (2006). Genetic regulatory networks programming hematopoietic stem cells and erythroid lineage specification. *Dev Biol* 294, 525-540.

Tyson, J.J., Chen, K.C., and Novak, B. (2003). Sniffers, buzzers, toggles and blinkers: dynamics of regulatory and signaling pathways in the cell. *Curr Opin Cell Biol* 15, 221-231.

Weber, E.H. (1905). *Tatsinn und Gemeingefuhl* (Leipzig: Verlag von Wilhelm Englemann).

Yi, T.M., Huang, Y., Simon, M.I., and Doyle, J. (2000). Robust perfect adaptation in bacterial chemotaxis through integral feedback control. *Proc Natl Acad Sci U S A* 97, 4649-4653.
